# Supplementary material for: Investigating partitioning of freeversusmacrocycle bound guest into a model POPC lipid bilayer
Source: Royal Society of Chemistry journal article supplement (doi:10.1039/d0ra02850a), 2020-01-01
Supplement: d0ra02850a1.pdf [file d0ra02850a1.pdf]

## Supplemental Information

# Investigating partitioning of free versus macrocycle bound guest into a model POPC lipid bilayer

Harshita Kumari,<sup>\*a</sup> Andrew Eisenhart,<sup>b</sup> Jinnipha Pajoubpong,<sup>a</sup> Frank Heinrich<sup>\*c,d</sup> and Thomas L. Beck<sup>\*b</sup>

Table S1: NR median fit results and 68% confidence limits for measurements with avobenzene.

|                                                                         | 100 $\mu$ M incubation                                         |                     | Rinse                                                          |                     |
|-------------------------------------------------------------------------|----------------------------------------------------------------|---------------------|----------------------------------------------------------------|---------------------|
|                                                                         | POPC-d <sub>31</sub>                                           | POPC                | POPC-d <sub>31</sub>                                           | POPC                |
| <b>Substrate</b>                                                        |                                                                |                     |                                                                |                     |
| Thickness silicon oxide ( $\text{\AA}$ )                                | 10.2 $\pm$ 0.6                                                 | 8.5 $\pm$ 0.5       | 9.4 $\pm$ 1.0                                                  | 8.9 $\pm$ 1.0       |
| Substrate roughness, $\sigma$ ( $\text{\AA}$ )                          | 2.4 $\pm$ 0.3                                                  |                     | 3 $\pm$ 1                                                      |                     |
| <b>Bilayer</b>                                                          |                                                                |                     |                                                                |                     |
| Thickness sub-membrane space ( $\text{\AA}$ )                           | 0.4 $\pm$ 0.4                                                  | 0.5 $\pm$ 0.4       | 0.4 $\pm$ 0.4                                                  | 0.8 $\pm$ 0.3       |
| Substrate-proximal hydrocarbon thickness (as-prepared) ( $\text{\AA}$ ) | 15.7 $\pm$ 0.6                                                 | 16.7 $\pm$ 0.5      | 15.9 $\pm$ 0.9                                                 | 17.9 $\pm$ 0.5      |
| Substrate-distal hydrocarbon thickness (as-prepared) ( $\text{\AA}$ )   | 14.5 $\pm$ 0.5                                                 | 13.3 $\pm$ 0.5      | 13.7 $\pm$ 0.9                                                 | 12.6 $\pm$ 0.5      |
| Thickness change per leaflet after adding avobenzene                    | +0.5 $\pm$ 0.2                                                 | +0.6 $\pm$ 0.2      | +0.7 $\pm$ 0.3                                                 | +0.4 $\pm$ 0.2      |
| Bilayer completeness, as-prepared                                       | 1.00 $\pm$ 0.0<br>1                                            | 1.00 $\pm$ 0.0<br>1 | 1.00 $\pm$ 0.0<br>1                                            | 1.00 $\pm$ 0.0<br>1 |
| Bilayer completeness, with avobenzene                                   | 0.99 $\pm$ 0.0<br>1                                            | 1.00 $\pm$ 0.0<br>1 | 1.00 $\pm$ 0.0<br>1                                            | 1.00 $\pm$ 0.0<br>1 |
| <b>Avobenzene</b>                                                       |                                                                |                     |                                                                |                     |
| Peak of avobenzene CVO from bilayer center ( $\text{\AA}$ )             | 10 $\pm$ 3                                                     |                     | 7 $\pm$ 3                                                      |                     |
| Surface volume density ( $\text{\AA}^3/\text{\AA}^2$ )                  | 3.0 $\pm$ 0.5<br>~1 avobenzene per 2.7 lipids in outer leaflet |                     | 3.8 $\pm$ 0.4<br>~1 avobenzene per 2.1 lipids in outer leaflet |                     |

Table S2: NR median fit results and 68% confidence limits for measurements with avobenzene : Calix[8] – PO<sub>3</sub>H<sub>2</sub>.

|                                                                        | 100 μM incubation                                          |               | Rinse                                                      |               |
|------------------------------------------------------------------------|------------------------------------------------------------|---------------|------------------------------------------------------------|---------------|
|                                                                        | POPC-d <sub>31</sub>                                       | POPC          | POPC-d <sub>31</sub>                                       | POPC          |
| Substrate                                                              |                                                            |               |                                                            |               |
| Thickness silicon oxide (Å)                                            | 11±1                                                       | 7±1           | 11±1                                                       | 7±1           |
| Substrate roughness, σ (Å)                                             | 4.6 ± 0.5                                                  |               | 4.8 ± 0.5                                                  |               |
| Bilayer                                                                |                                                            |               |                                                            |               |
| Thickness sub-membrane space (Å)                                       | 1±2                                                        | 1.0±0.6       | 2±2                                                        | 1±1           |
| Substrate-proximal hydrocarbon thickness (as-prepared) (Å)             | 13±1                                                       | 16±1          | 13±1                                                       | 16±1          |
| Substrate-distal hydrocarbon thickness (as-prepared) (Å)               | 14±1                                                       | 13±1          | 14±1                                                       | 13±1          |
| Thickness change per leaflet after adding avobenzene : Calix[8]        | +0.1±0.2                                                   | -0.3±0.1      | +0.4±0.3                                                   | -0.4±0.1      |
| Bilayer completeness, as-prepared                                      | 1.00±0.0<br>1                                              | 1.00±0.0<br>1 | 1.00±0.0<br>1                                              | 1.00±0.0<br>1 |
| Bilayer completeness, with avobenzene : Calix[8]                       | 0.99±0.0<br>1                                              | 0.99±0.0<br>1 | 0.99±0.0<br>1                                              | 0.99±0.0<br>1 |
| Avobenzene : Calix[8]                                                  |                                                            |               |                                                            |               |
| Peak of avobenzene CVO from bilayer center (Å)                         | 11± 3                                                      |               | 10± 3                                                      |               |
| Surface volume density of avobenzene (Å <sup>3</sup> /Å <sup>2</sup> ) | 2.3 ± 0.6<br>~1 avobenzene per 3.0 lipids in outer leaflet |               | 2.5 ± 0.4<br>~1 avobenzene per 2.8 lipids in outer leaflet |               |
| Surface volume density of Calix[8] (Å <sup>3</sup> /Å <sup>2</sup> )   | 0.7±0.5 (not significant)                                  |               | 0.6±0.5 (not significant)                                  |               |

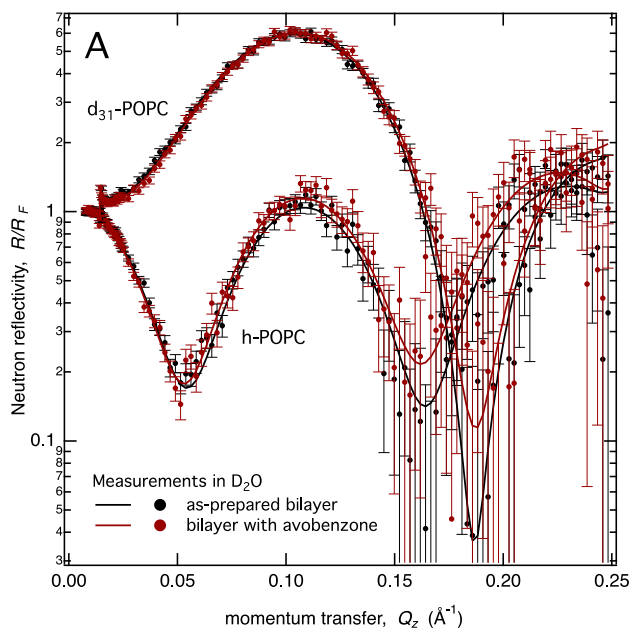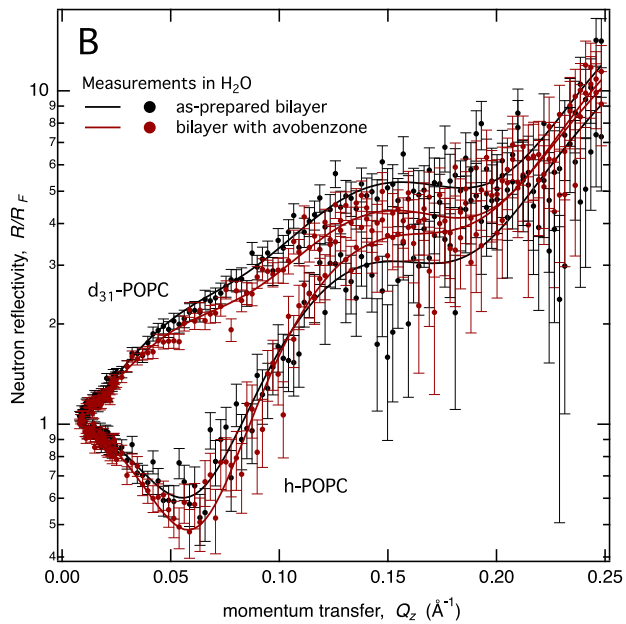

Figure S1: Fresnel-normalized neutron reflectivity curves for two independent measurements of a h-POPC and a  $d_{31}$ -POPC bilayer, as-prepared and while incubating  $100 \mu\text{M}$  avobenzene. Each condition was characterized using two isotopically distinct bulk solvents, (A)  $H_2O$  and (B)  $D_2O$ . Significant changes in the reflectivity were observed for most combinations of bilayer and bulk solvent upon addition of avobenzene. The entire set of 8 reflectivity curves was analysed simultaneously using one structural model. Combining two measurement with bilayers that differ in their lipid chain deuteration was essential in resolving avobenzene in the lipid bilayer core. Qualitatively similar reflectivities were recorded after rinsing and for the complex of avobenzene and Calix[8] -  $PO_3H_2$  during incubation and after rinsing.
